# Supplementary material for: Conformational flexibility driving charge-selective substrate translocation across a bacterial transporter
Source: Royal Society of Chemistry journal article supplement (doi:10.1039/d4sc00345d), 2024-01-01
Supplement: d4sc00345d1.pdf [file d4sc00345d1.pdf]

## Supporting Information

### Conformational Flexibility Driving Charge-Selective Substrate Translocation Across Bacterial Transporter

Devika Vikraman<sup>a,b,†</sup>, Bibhab Bandhu Majumdar<sup>c,†</sup>, Sharavanakkumar SK<sup>a</sup>, Conrad Weichbrodt<sup>d</sup>, Niels Fertig<sup>d</sup>, Mathias Winterhalter<sup>e,f</sup>, Jagannath Mondal<sup>\*g</sup>, Kozhinjampara R Mahendran<sup>\*a</sup>

<sup>†</sup>Contributed equally to this work

<sup>a</sup>Transdisciplinary Research Program, Rajiv Gandhi Centre for Biotechnology, Thiruvananthapuram 695014, India.

<sup>b</sup>Manipal Academy of Higher Education, Manipal, Karnataka, India-576104

<sup>c</sup>School of Advanced Sciences, VIT-AP University, Amaravati, Andhra Pradesh 522237, India

<sup>d</sup>Nanion Technologies GmbH, Munich, 80339 Germany.

<sup>e</sup>School of Science, Constructor University, Campus Ring 1, 28759 Bremen, Germany

<sup>f</sup>Center for Hybrid Nanostructures (CHyN), Universität Hamburg, Luruper Chaussee 149, Hamburg 22761 Germany

<sup>g</sup>Tata Institute of Fundamental Research, Hyderabad, Telangana, India-500046

\*To whom correspondence should be addressed

e-mail: [mahendran@rgcb.res.in](mailto:mahendran@rgcb.res.in)

[jmondal@tifrh.res.in](mailto:jmondal@tifrh.res.in)

## Contents

|                                                                                                                                           |    |
|-------------------------------------------------------------------------------------------------------------------------------------------|----|
| <b>Supplementary Materials</b>                                                                                                            | 3  |
| <b>Supplementary Text</b>                                                                                                                 | 3  |
| <b>Supplementary Table</b>                                                                                                                | 6  |
| Table S1: The pKa values were obtained from titratable amino acid residues in CymA pores using the PropKa program.                        | 6  |
| Table S2: Am <sub>6</sub> αCD-binding kinetics with native CymA at pH 8.0.                                                                | 10 |
| Table S3: Am <sub>6</sub> αCD-binding kinetics with truncated CymA at pH 8.0.                                                             | 10 |
| Table S4: S <sub>6</sub> αCD-binding kinetics with truncated CymA at pH 4.5.                                                              | 11 |
| Table S5: Description of the different components of the simulation systems.                                                              | 11 |
| Table S6: Description of simulation systems.                                                                                              | 12 |
| <br>                                                                                                                                      |    |
| <b>Supplementary Figures</b>                                                                                                              |    |
| Fig. S1: CymA structures, orientation and electrophoretic pulling of cationic analytes.                                                   | 13 |
| Fig. S2: Gating pattern of native CymA.                                                                                                   | 14 |
| Fig. S3: Gating pattern of truncated CymA.                                                                                                | 15 |
| Fig. S4: Interaction of am <sub>6</sub> αCD with native CymA under different pH conditions.                                               | 16 |
| Fig. S5: Representative configuration of the hydrated CymA embedded in DPhPC lipid bilayer MD-simulation system with am <sub>6</sub> αCD. | 17 |
| Fig. S6: Multiple Configurations of the am <sub>6</sub> αCD while translocating through the native CymA.                                  | 18 |
| Fig. S7: A one-dimensional free energy profile was obtained for am <sub>6</sub> αCD. translocation through native CymA at pH 4.5 and 8.   | 19 |
| Fig. S8: Interaction of am <sub>6</sub> αCD with truncated CymA at pH 4.5 and 8.                                                          | 20 |
| Fig. S9: Interaction of s <sub>6</sub> αCD with native CymA under different pH conditions.                                                | 21 |
| Fig. S10: Interaction of s <sub>6</sub> αCD with truncated CymA under different pH conditions.                                            | 22 |
| Fig. S11: Interaction of neutral αCD with CymA pores at different pHs.                                                                    | 23 |
| Fig. S12: Interaction of am <sub>6</sub> αCD, s <sub>6</sub> αCD and αCD with truncated CymA.                                             | 24 |
| Fig. S13: Interaction of am <sub>6</sub> αCD and s <sub>6</sub> αCD with truncated CymA in orbit16.                                       | 25 |
| Fig. S14: Molecular model of substrate translocation through CymA.                                                                        | 26 |
| Fig. S15 CymA protein residues involved in polar interactions with am <sub>6</sub> αCD.                                                   | 27 |
| Fig. S16 A minimum free energy path (MFEP) obtained using a post-string approach.                                                         | 28 |
| Fig. S17: Single-channel properties of fully truncated CymA.                                                                              | 29 |
| Fig. S18: Interaction of neomycin with truncated CymA.                                                                                    | 30 |
| <br>                                                                                                                                      |    |
| <b>References</b>                                                                                                                         | 31 |

**Materials used:**

The following materials were used for the study: 1,2-diphytanoyl-*sn*-glycero-3-phosphocholine (DPhPC, Avanti Polar Lipids), pentane (Sigma-Aldrich Merck), hexadecane (Sigma-Aldrich Merck), n-Octylpolyoxyethylene (Octyl-POE, Sigma-Aldrich Merck), hexakis-(6-amino-6-deoxy)- $\alpha$ -cyclodextrin hexahydrochloride ( $\text{am}_6\alpha\text{CD}$ , AraChem Cyclodextrin-Shop), cyclic hexasaccharide sulfate ( $\text{s}_6\alpha\text{CD}$ , AraChem Cyclodextrin-Shop), potassium chloride (Sigma-Aldrich Merck), 4-(2-hydroxyethyl)-1-piperazineethanesulfonic acid (HEPES, Sigma-Aldrich Merck), citric acid monohydrate (Sigma-Aldrich), Potassium phosphate dibasic and Dibasic potassium phosphate (Sigma-Aldrich Merck), 2-Propanol (Sigma-Aldrich Merck), all other reagents (Sigma-Aldrich Merck).

**Supporting Text:****Molecular Dynamics Simulations**

The missing residues in native CymA protein (residues 10 to 21) were modelled in CHARMM-GUI as described in the Methods section in the main text<sup>1</sup>. The protein was then protonated at pH 4.5 and 8 using the PDB2PQR webserver that uses PropKa to calculate the  $\text{pK}_a$  values of the titratable amino acid residues (see Table S1)<sup>2,3</sup>. The charge of the native CymA protein at pH 4.5 and 8.0 was determined to be +14 and -6, respectively. The CymA protein was inserted in a DPhPC lipid bilayer containing 115 lipid molecules, each on the upper and the lower leaflets, resulting in 230 lipid molecules. The membrane-protein system was built in a tetragonal simulation box with box vectors: 10.2, 10.2 and 10.9 nm in the x, y and z-directions, respectively. The simulation system was solvated using TIP3P-charmm water molecules and neutralized by adding  $\text{K}^+$  and  $\text{Cl}^-$  ions to obtain 0.15 M KCl concentration. The simulation system with CymA, DPhPC lipid bilayer (PHPC in CHARMM-GUI), water and ions was prepared using the Membrane-Builder utility in the CHARMM-GUI webserver<sup>1</sup>. A three-dimensional structure of the neutral  $\alpha$ -cyclodextrin was obtained from the PubChem database (PubChem id: 444913). The six hydroxymethyl groups ( $-\text{CH}_2\text{OH}$ ) in neutral-  $\alpha$ -cyclodextrin ( $\alpha\text{CD}$ ) were modified to methylammonium cations ( $-\text{CH}_2\text{-NH}_3^+$ ) to obtain a cationic- $\alpha$ -cyclodextrin ( $\text{am}_6\alpha\text{CD}$ ) molecule with +6 charge using the PYMOL software package. The geometry-optimized structure of the  $\alpha\text{CD}$  molecule was then used as a cationic  $\alpha$ -cyclodextrin. The geometry optimization was performed using the Avogadro software package. The hydroxymethyl groups in neutral-  $\alpha$ -cyclodextrin were modified to methyl sulfonate anions ( $-\text{CH}_2\text{-SO}_3^-$ ) for obtaining an anionic  $\alpha$ -cyclodextrin ( $\text{s}_6\alpha\text{CD}$ ) molecule with -6 charge. To

prepare the truncated CymA, we removed the first 15 residues of the native CymA and followed a similar protocol as described for native CymA for protonating ionizable amino acid residues at pH 4.5 and 8.0. The protein, lipids and ions were parameterized using CHARMM36 forcefield while the CD-based ligands were modelled using CHARMM general force field (CGENFF forcefield)<sup>4-7</sup>. Tables S5 and S6 provide the details for each system simulated in the present investigation.

The CD was inserted in the membrane protein system towards the extracellular side aligned with the z-axis. After an initial energy minimization using the steepest descents algorithm, the membrane-protein system was then equilibrated for 10 ns using a canonical (NVT) ensemble, followed by 20 ns equilibration using an isothermal and isobaric ensemble (NPT) with position restraints on protein, lipid and ligand heavy atoms. The Verlet cutoff scheme was employed with a minimum cutoff of 1.2 nm for the Lenard Jones interaction and short-range electrostatic interactions throughout the simulation<sup>8</sup>. Long-range electrostatic interactions were treated by the Particle Mesh Ewald (PME) summation method<sup>9</sup>. All bonds connected to hydrogen atoms were constrained using the LINCS algorithm<sup>10</sup>. The bonds and the angles of TIP3P water molecules were constrained using the SETTLE algorithm<sup>11</sup>. A time-step of 2 fs was used for all MD simulations.

During equilibration, the temperature and pressure were kept constant at 303.15 K and 1 bar using the Berendsen thermostat and barostat with time constants of 1 ps and 5 ps, respectively<sup>12</sup>. However, the Nose Hoover thermostat and Parinello-Rahman barostat were used for all production runs<sup>13,14</sup>. The equilibrated membrane-protein system was then subjected to steered MD simulation, where the CD was steered through the CymA from the extracellular to the periplasmic region by pulling the CD very slowly across the pore. The cyclodextrin was pulled through the pore slowly along the z-direction using a pull force with a force constant of 100 kJ mol<sup>-1</sup> nm<sup>-2</sup> and a pulling rate of 0.1 Å/ns. The steered MD simulations were run sufficiently long for the CD to translocate and move out of the pore. The snapshots from the steered MD simulations were used as initial configurations for the umbrella sampling simulations. We have run 121 umbrellas for reaction-coordinate values ranging from -3.00 nm to +3.00. The negative and positive values of the reaction coordinate refer to the CD translocation from the extracellular to the periplasmic side. Each umbrella was run for 10 ns total simulation time. The harmonic restraint force constant was set to 1000 kJ mol<sup>-1</sup> nm<sup>-2</sup> for umbrella sampling simulations, ensuring good overlap between adjacent umbrella histograms. The free energy

profile as a function of the reaction coordinate was obtained by reweighting the probability distributions of the reaction coordinate using the WHAM (Weighted Histogram Analysis Method) tool implemented in the GROMACS MD simulation software package<sup>15</sup>. All MD simulations were run using the GROMACS-2018 software simulation package. Periodic boundary conditions were employed in x, y, and z-directions. All snapshots were obtained using the molecular visualization packages PyMol and VMD<sup>16</sup>.

The details of the simulation systems are shown in Table S5 and Table S6, respectively. The simulation systems involving translocating the am<sub>6</sub>αCD at pH 8 and 4.5 are designated nat-am<sub>6</sub>αCDpH8 and nat-am<sub>6</sub>αCD4.5, respectively. The simulation system involving translocating s<sub>6</sub>αCD at pH 8 and 4.5 across the truncated CymA is designated trunc-s<sub>6</sub>αCDpH8 and trunc-s<sub>6</sub>αCDpH4.5, respectively. The simulation systems with am<sub>6</sub>αCD translocating through truncated CymA at pH 8 and 4.5 are referred to as trunc-am<sub>6</sub>αCDpH8 and trunc-am<sub>6</sub>αCDpH4.5, respectively.

**Supplementary Tables:**

| <b>Residue</b> | <b>pKa inside protein</b> | <b>Model pKa</b> |
|----------------|---------------------------|------------------|
| ASP 3          | 4.08                      | 3.80             |
| ASP 11         | 4.87                      | 3.80             |
| ASP 15         | 6.35                      | 3.80             |
| ASP 33         | 3.41                      | 3.80             |
| ASP 43         | 3.88                      | 3.80             |
| ASP 88         | 3.71                      | 3.80             |
| ASP 101        | 3.32                      | 3.80             |
| ASP 125        | 4.09                      | 3.80             |
| ASP 148        | 3.96                      | 3.80             |
| ASP 165        | 3.11                      | 3.80             |
| ASP 204        | 3.94                      | 3.80             |
| ASP 209        | 3.64                      | 3.80             |
| ASP 217        | 4.30                      | 3.80             |
| ASP 232        | 3.37                      | 3.80             |
| ASP 233        | 3.92                      | 3.80             |
| ASP 252        | 3.32                      | 3.80             |
| ASP 266        | 2.90                      | 3.80             |
| GLU 10         | 3.65                      | 4.50             |
| GLU 16         | 5.08                      | 4.50             |
| GLU 30         | 5.11                      | 4.50             |
| GLU 32         | 5.69                      | 4.50             |
| GLU 46         | 3.98                      | 4.50             |
| GLU 52         | 3.37                      | 4.50             |
| GLU 74         | 4.24                      | 4.50             |
| GLU 77         | 4.61                      | 4.50             |
| GLU 80         | 4.85                      | 4.50             |
| GLU 85         | 3.58                      | 4.50             |

|         |       |       |
|---------|-------|-------|
| GLU 87  | 2.23  | 4.50  |
| GLU 113 | 3.87  | 4.50  |
| GLU 115 | 5.64  | 4.50  |
| GLU 135 | 6.53  | 4.50  |
| GLU 158 | 2.62  | 4.50  |
| GLU 164 | 5.55  | 4.50  |
| GLU 174 | 2.77  | 4.50  |
| GLU 191 | 6.93  | 4.50  |
| GLU 195 | 4.67  | 4.50  |
| GLU 205 | 3.54  | 4.50  |
| GLU 214 | 4.12  | 4.50  |
| GLU 220 | 4.99  | 4.50  |
| GLU 224 | 3.15  | 4.50  |
| GLU 247 | 3.56  | 4.50  |
| GLU 275 | 4.96  | 4.50  |
| GLU 280 | 4.19  | 4.50  |
| GLU 287 | 3.21  | 4.50  |
| GLU 289 | 3.93  | 4.50  |
| GLU 293 | 4.73  | 4.50  |
| GLU 295 | 5.57  | 4.50  |
| GLU 304 | 1.70  | 4.50  |
| GLU 310 | 3.08  | 4.50  |
| HIS 24  | 5.31  | 6.50  |
| HIS 100 | 6.68  | 6.50  |
| HIS 136 | 5.78  | 6.50  |
| HIS 314 | 6.14  | 6.50  |
| TYR 7   | 12.55 | 10.00 |
| TYR 31  | 11.31 | 10.00 |
| TYR 58  | 9.67  | 10.00 |
| TYR 69  | 10.86 | 10.00 |

|         |       |       |
|---------|-------|-------|
| TYR 83  | 11.52 | 10.00 |
| TYR 84  | 10.40 | 10.00 |
| TYR 112 | 10.90 | 10.00 |
| TYR 116 | 10.14 | 10.00 |
| TYR 122 | 10.19 | 10.00 |
| TYR 141 | 12.56 | 10.00 |
| TYR 144 | 9.65  | 10.00 |
| TYR 149 | 10.09 | 10.00 |
| TYR 154 | 13.54 | 10.00 |
| TYR 159 | 10.76 | 10.00 |
| TYR 177 | 10.24 | 10.00 |
| TYR 184 | 15.29 | 10.00 |
| TYR 197 | 13.11 | 10.00 |
| TYR 198 | 10.28 | 10.00 |
| TYR 222 | 15.47 | 10.00 |
| TYR 229 | 10.73 | 10.00 |
| TYR 238 | 13.53 | 10.00 |
| TYR 263 | 11.19 | 10.00 |
| TYR 274 | 9.93  | 10.00 |
| TYR 288 | 10.86 | 10.00 |
| TYR 290 | 10.06 | 10.00 |
| LYS 8   | 8.22  | 10.50 |
| LYS 34  | 10.73 | 10.50 |
| LYS 44  | 10.26 | 10.50 |
| LYS 45  | 10.33 | 10.50 |
| LYS 47  | 10.57 | 10.50 |
| LYS 72  | 10.05 | 10.50 |
| LYS 79  | 10.40 | 10.50 |
| LYS 91  | 11.62 | 10.50 |
| LYS 98  | 10.03 | 10.50 |



|         |       |       |
|---------|-------|-------|
| LYS 120 | 10.20 | 10.50 |
| LYS 131 | 10.48 | 10.50 |
| LYS 163 | 9.67  | 10.50 |
| LYS 171 | 10.56 | 10.50 |
| LYS 182 | 9.99  | 10.50 |
| LYS 185 | 10.29 | 10.50 |
| LYS 201 | 10.51 | 10.50 |
| LYS 206 | 10.19 | 10.50 |
| LYS 215 | 10.52 | 10.50 |
| LYS 245 | 11.27 | 10.50 |
| LYS 249 | 11.03 | 10.50 |
| LYS 265 | 10.64 | 10.50 |
| LYS 269 | 9.96  | 10.50 |
| LYS 285 | 9.79  | 10.50 |
| LYS 296 | 10.12 | 10.50 |
| LYS 297 | 11.35 | 10.50 |
| LYS 308 | 10.71 | 10.50 |
| ARG 5   | 14.99 | 12.50 |
| ARG 37  | 12.42 | 12.50 |
| ARG 76  | 14.76 | 12.50 |
| ARG 118 | 12.63 | 12.50 |
| ARG 130 | 12.12 | 12.50 |
| ARG 139 | 13.95 | 12.50 |
| ARG 166 | 12.41 | 12.50 |
| ARG 172 | 15.16 | 12.50 |
| ARG 186 | 13.43 | 12.50 |
| ARG 221 | 12.54 | 12.50 |
| ARG 240 | 12.68 | 12.50 |
| ARG 242 | 14.82 | 12.50 |
| ARG 253 | 12.47 | 12.50 |

|         |       |       |
|---------|-------|-------|
| ARG 268 | 12.45 | 12.50 |
| ARG 299 | 12.41 | 12.50 |
| ARG 306 | 11.69 | 12.50 |

**Table S1.** The actual and model pKa values were obtained for titratable amino acid residues in CymA pores. The pKa values were obtained using the PDB2PQR web server that uses the PropKa program. The estimated pKa values inside the protein, as predicted by the program, were employed to determine the charge of the protein at pH 4.5 and 8.0.

| Voltage | $K_{on}$ ( $M^{-1}s^{-1}$ ) | $K_{off}$ ( $s^{-1}$ ) | $K_D$ ( $M^{-1}$ )    |
|---------|-----------------------------|------------------------|-----------------------|
| + 25 mV | $3.0 \times 10^7$           | $1.6 \times 10^3$      | $5.33 \times 10^{-5}$ |
| + 50 mV | $4.0 \times 10^7$           | $2.0 \times 10^3$      | $5.00 \times 10^{-5}$ |
| + 75 mV | $5.5 \times 10^7$           | $2.8 \times 10^3$      | $5.09 \times 10^{-5}$ |

**Table S2. Am<sub>6</sub>αCD-binding kinetics with native CymA at pH 8.0**

The dissociation constants ( $K_D = k_{off}/k_{on}$ ) were calculated from the association ( $k_{on}$ ) and dissociation ( $k_{off}$ ) rate constants. Electrolyte: 1M KCl, 10 mM HEPES, pH 8.0. CDs were added to the trans side. Mean values ( $\pm$  s.d.) from at least three independent experiments ( $n = 3$ ).

| Voltage | $K_{on}$ ( $M^{-1}s^{-1}$ ) | $K_{off}$ ( $s^{-1}$ ) | $K_D$ ( $M^{-1}$ )    |
|---------|-----------------------------|------------------------|-----------------------|
| + 25 mV | $1.5 \times 10^7$           | $2.3 \times 10^3$      | $1.53 \times 10^{-4}$ |
| + 50 mV | $2.5 \times 10^7$           | $2.8 \times 10^3$      | $1.12 \times 10^{-4}$ |
| + 75 mV | $3.5 \times 10^7$           | $4.1 \times 10^3$      | $1.17 \times 10^{-4}$ |

**Table S3. Am<sub>6</sub>αCD-binding kinetics with truncated CymA at pH 8.0**

The dissociation constants ( $K_D = k_{off}/k_{on}$ ) were calculated from the association ( $k_{on}$ ) and dissociation ( $k_{off}$ ) rate constants. Electrolyte: 1M KCl, 10 mM HEPES, pH 8.0. CDs were added to the trans side. Mean values ( $\pm$  s.d.) from at least three independent experiments ( $n = 3$ ).

| Voltage | $K_{on}$ ( $M^{-1}s^{-1}$ ) | $K_{off}$ ( $s^{-1}$ ) | $K_D$ ( $M^{-1}$ )    |
|---------|-----------------------------|------------------------|-----------------------|
| -50 mV  | $4.0 \times 10^5$           | $4.0 \times 10^3$      | $1.00 \times 10^{-2}$ |
| -75 mV  | $1.0 \times 10^6$           | $2.6 \times 10^3$      | $2.60 \times 10^{-3}$ |
| -100 mV | $3.1 \times 10^6$           | $3.3 \times 10^3$      | $1.06 \times 10^{-3}$ |
| -125 mV | $4.5 \times 10^6$           | $4.5 \times 10^3$      | $1.00 \times 10^{-3}$ |

**Table S4.  $S_6\alpha$ CD-binding kinetics with truncated CymA at pH 4.5**

The dissociation constants ( $K_D = k_{off}/k_{on}$ ) were calculated from the association ( $k_{on}$ ) and dissociation ( $k_{off}$ ) rate constants. Electrolyte: 1M KCl, 10 mM citrate, pH 4.5 CDs were added to the trans side. Mean values ( $\pm$  s.d.) from at least three independent experiments ( $n = 3$ ).

| System                      | pH  | Protein        | Cyclodextrin    | $q_{Protein}$ | $q_{CD}$ |
|-----------------------------|-----|----------------|-----------------|---------------|----------|
| nat- $am_6\alpha$ CDpH8.0   | 8.0 | Native CymA    | $am_6\alpha$ CD | -6            | +6       |
| nat- $am_6\alpha$ CDpH4.5   | 4.5 | Native CymA    | $am_6\alpha$ CD | +14           | +6       |
| trunc- $am_6\alpha$ CDpH8.0 | 8.0 | truncated CymA | $am_6\alpha$ CD | -4            | +6       |
| trunc- $am_6\alpha$ CDpH4.5 | 4.5 | truncated CymA | $am_6\alpha$ CD | +15           | +6       |
| trunc- $s_6\alpha$ CDpH4.5  | 4.5 | truncated CymA | $s_6\alpha$ CD  | +15           | -6       |
| trunc- $s_6\alpha$ CDpH8.0  | 8.0 | truncated CymA | $s_6\alpha$ CD  | -4            | -6       |

**Table S5.** Description of the different components of the simulation systems: system nomenclatures, pHs, description of the protein, cyclodextrin, charge of the protein and charge of the cyclodextrin. Truncated CymA refers to the CymA protein where residues 1 to 15 were removed. Each simulation system is named after the corresponding cyclodextrin.

| System                         | pH  | box-X (nm) | box-Y (nm) | box-Z (nm) | N <sub>atoms</sub> |
|--------------------------------|-----|------------|------------|------------|--------------------|
| nat-am <sub>6</sub> αCDpH8     | 8   | 10.19      | 10.19      | 10.91      | 107345             |
| nat-am <sub>6</sub> αCDpH4.5   | 4.5 | 10.19      | 10.19      | 10.91      | 107304             |
| trunc-am <sub>6</sub> αCDpH4.5 | 8   | 10.18      | 10.18      | 10.90      | 107018             |
| trunc-am <sub>6</sub> αCDpH8   | 4.5 | 10.18      | 10.18      | 10.90      | 107069             |
| trunc-s <sub>6</sub> αCDpH4.5  | 4.5 | 10.18      | 10.18      | 10.90      | 107066             |
| trunc-s <sub>6</sub> αCDpH8    | 8   | 10.18      | 10.18      | 10.90      | 106970             |

**Table S6.** Description of simulation systems: Simulation system nomenclatures and their corresponding pHs, simulation box vectors in X, Y and Z-directions, and the total number of atoms present in simulation boxes. N<sub>atoms</sub> refers to the total number of atoms in the simulation systems.

## Supplementary Figures

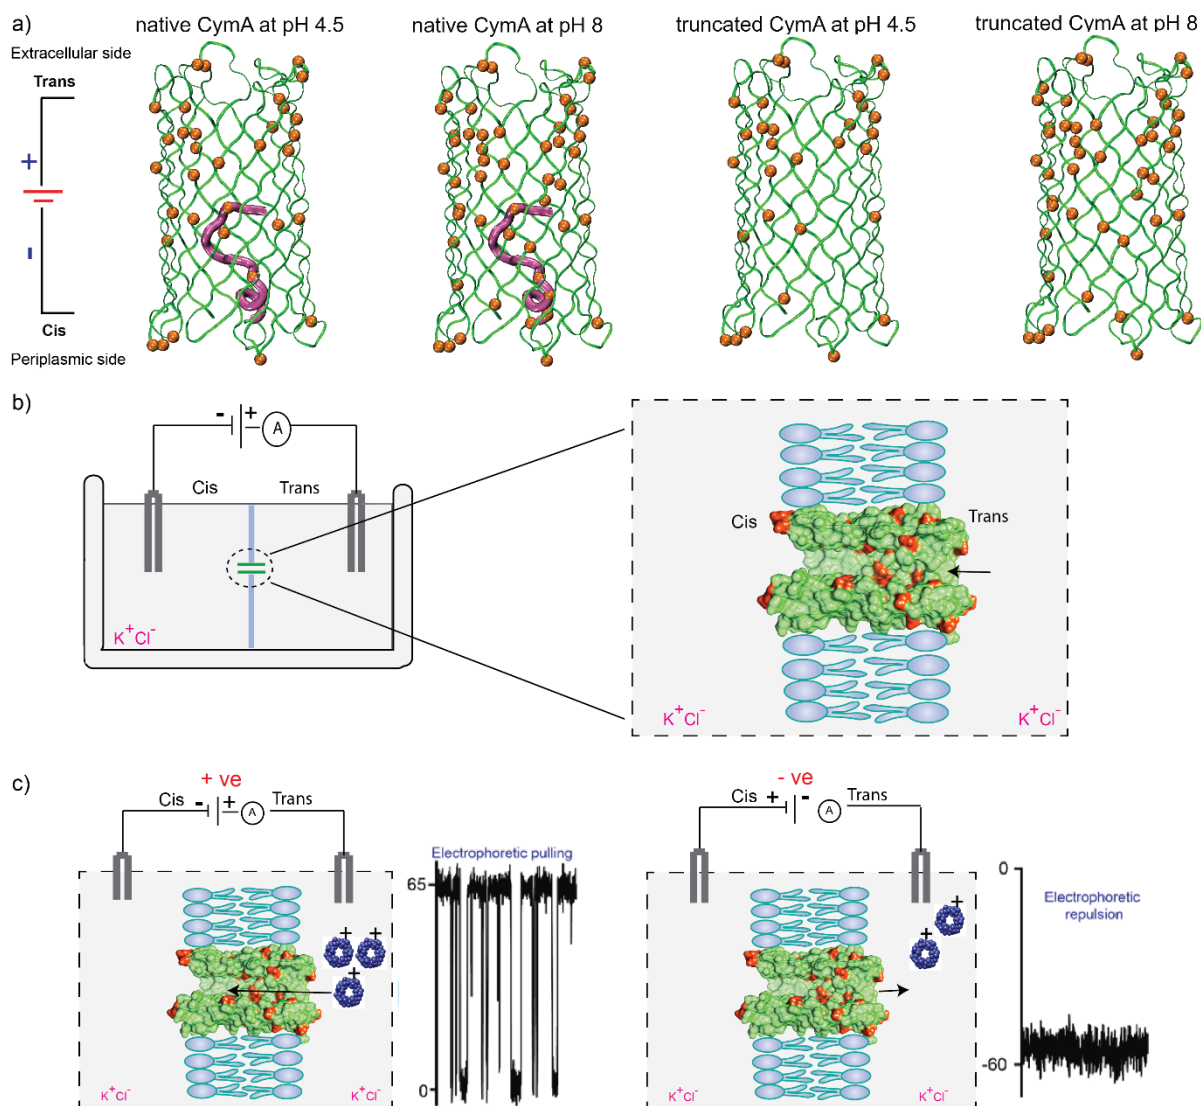

**Fig. S1** CymA structures, orientation and electrophoretic pulling of cationic analytes.

**a)** The pores are shown in a ribbon representation (green), and the negatively charged amino acids are shown in a space-filling sphere representation (orange). The N terminus segment is shown by a tube representation (red). **b)** A schematic showing pore insertion and orientation in the planar lipid bilayers. The extracellular part of the pore composed of dense negatively charged residues is exposed to the trans compartment. **c)** The voltage-driven electrophoretic pulling of cationic analytes (represented in green) added to the trans side into the pore, specifically at positive voltages, resulting in ion current blockages. No blockages are observed at negative voltages due to electrophoretic repulsion of cationic analytes added to the trans side of the pore.

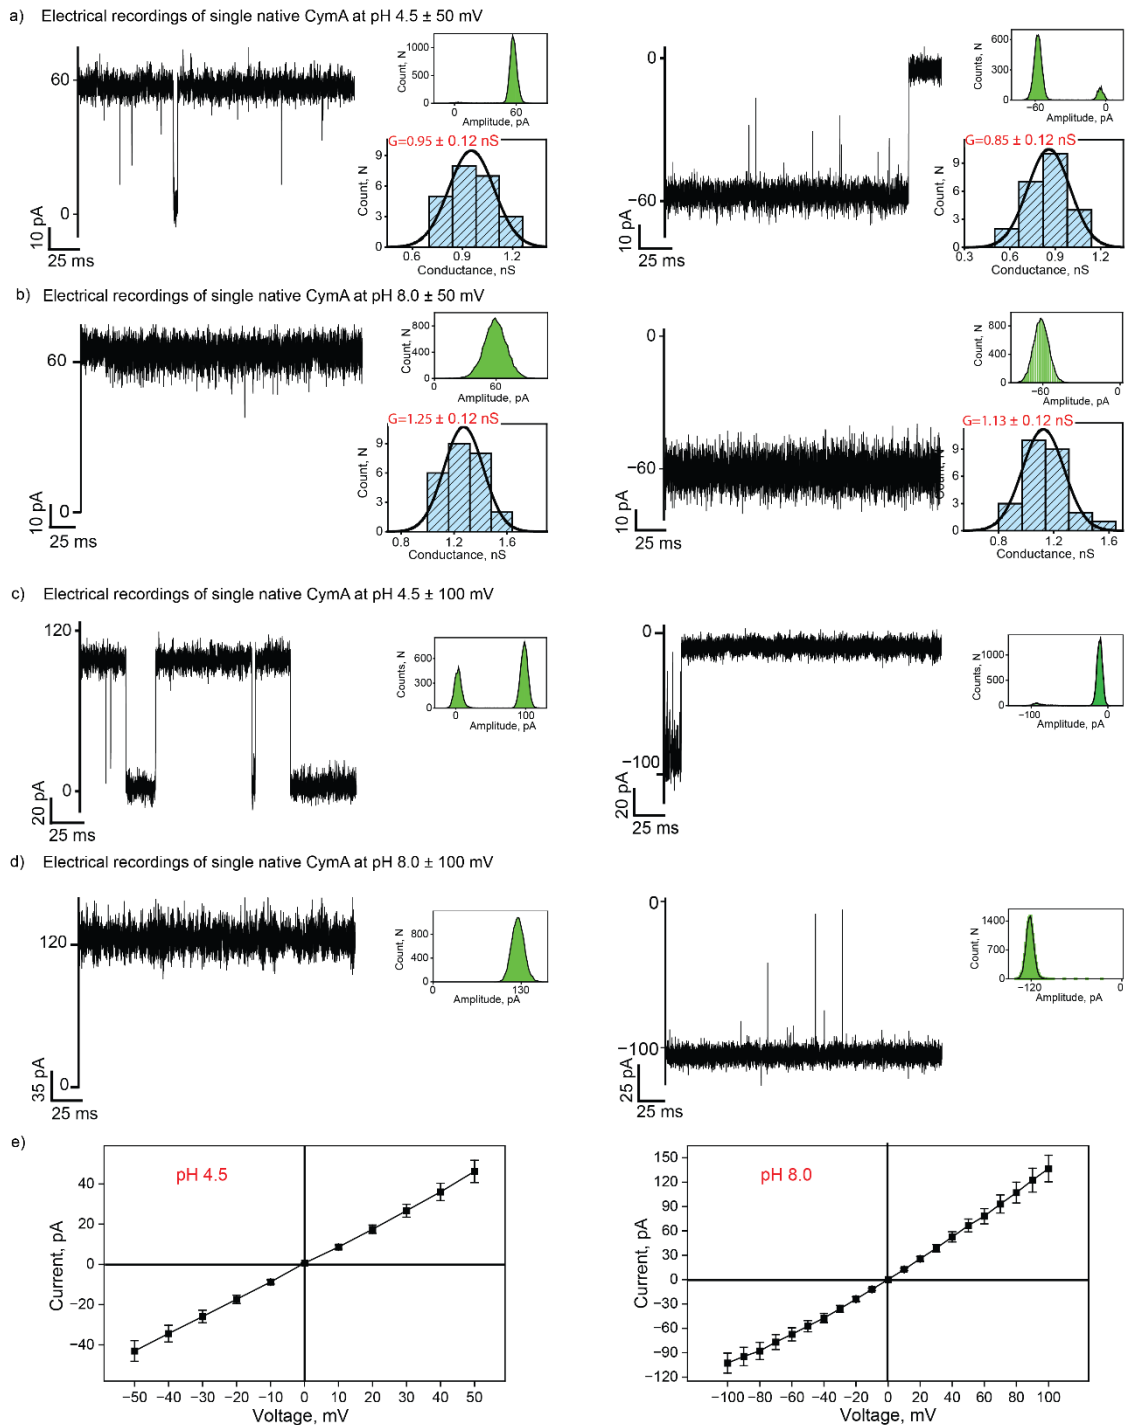

**Fig. S2** Gating pattern of native CymA.

**a)** Electrical recordings of single native CymA at  $\pm 50$  mV in pH 4.5. The unitary conductance ( $n=25$ ) and current amplitude histogram are shown. **b)** Electrical recordings of single native CymA at  $\pm 50$  mV in pH 8.0. The unitary conductance ( $n=25$ ) and current amplitude histogram are shown. **c)** Electrical recordings of single native CymA at  $\pm 100$  mV in pH 4.5 and **d)** pH 8.0. All points current amplitude histogram is shown. **e)** I-V curve obtained from a single native CymA in pH 4.5 and 8.0. The current signals were digitally filtered at 7 kHz.

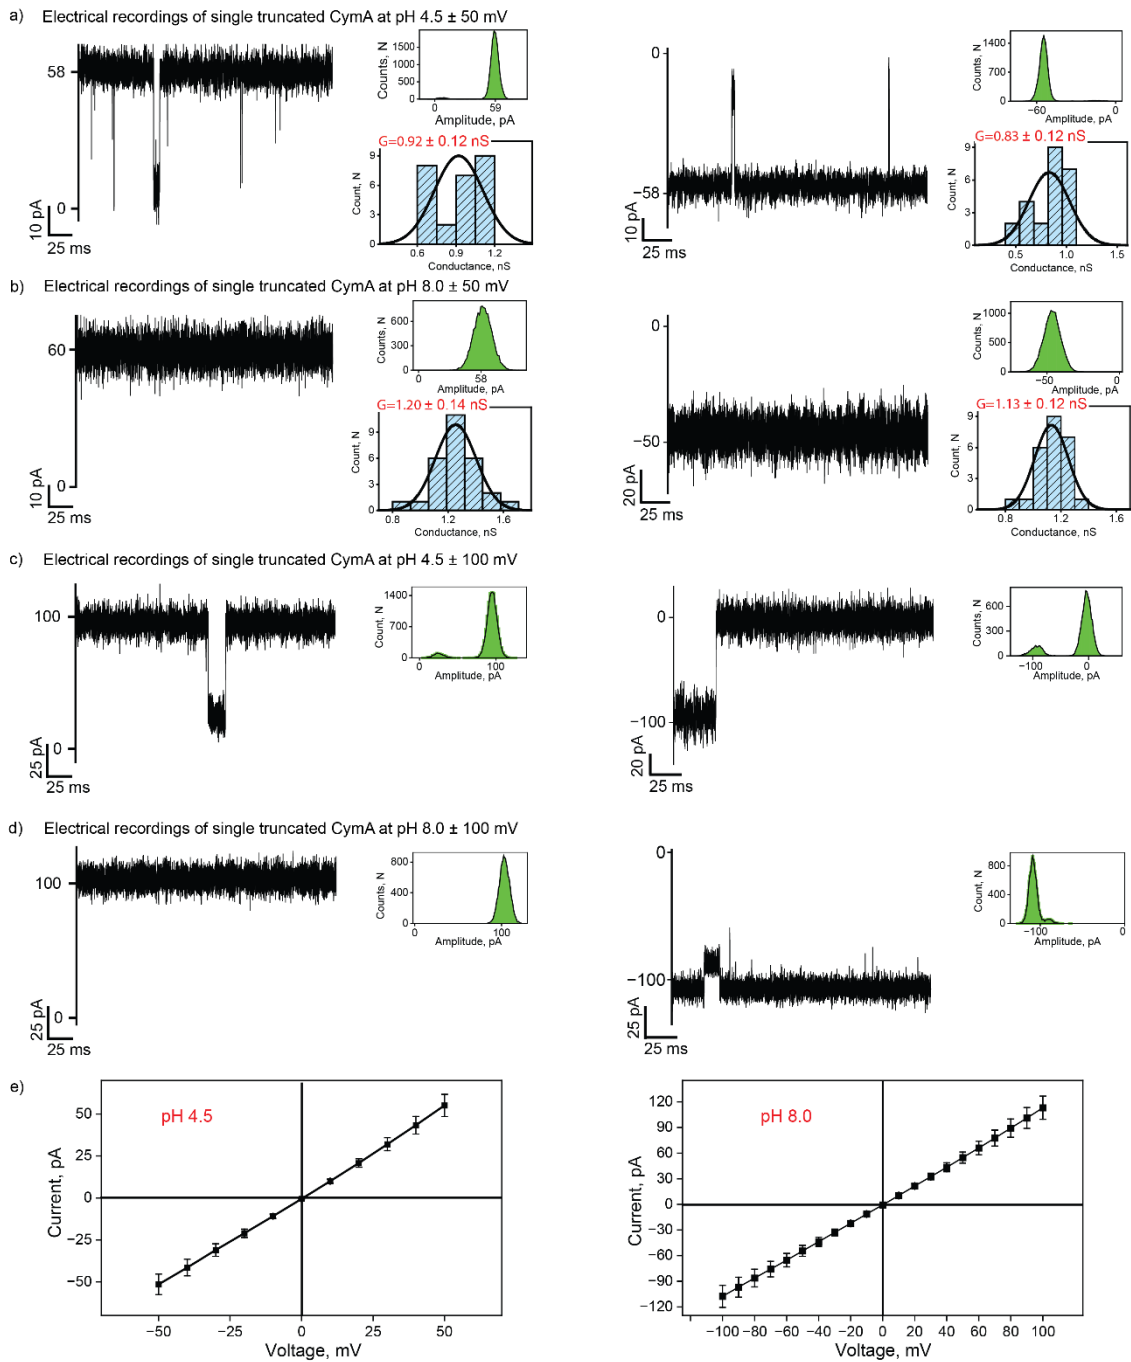

**Fig. S3** Gating pattern of truncated CymA.

**a)** Electrical recordings of single truncated CymA at  $\pm 50$  mV in pH 4.5. The unitary conductance ( $n=25$ ) and current amplitude histogram are shown. **b)** Electrical recordings of single truncated CymA at  $\pm 50$  mV in pH 8.0. The unitary conductance ( $n=25$ ) and current amplitude histogram are shown. **c)** Electrical recordings of single truncated CymA at  $\pm 100$  mV in pH 4.5 and current amplitude histogram are shown. **d)** Electrical recordings of single truncated CymA at  $\pm 100$  mV in pH 8.0 and current amplitude histogram are shown. **e)** I-V curve obtained from a single truncated CymA in pH 4.5 and 8.0. The current signals were digitally filtered at 7 kHz.

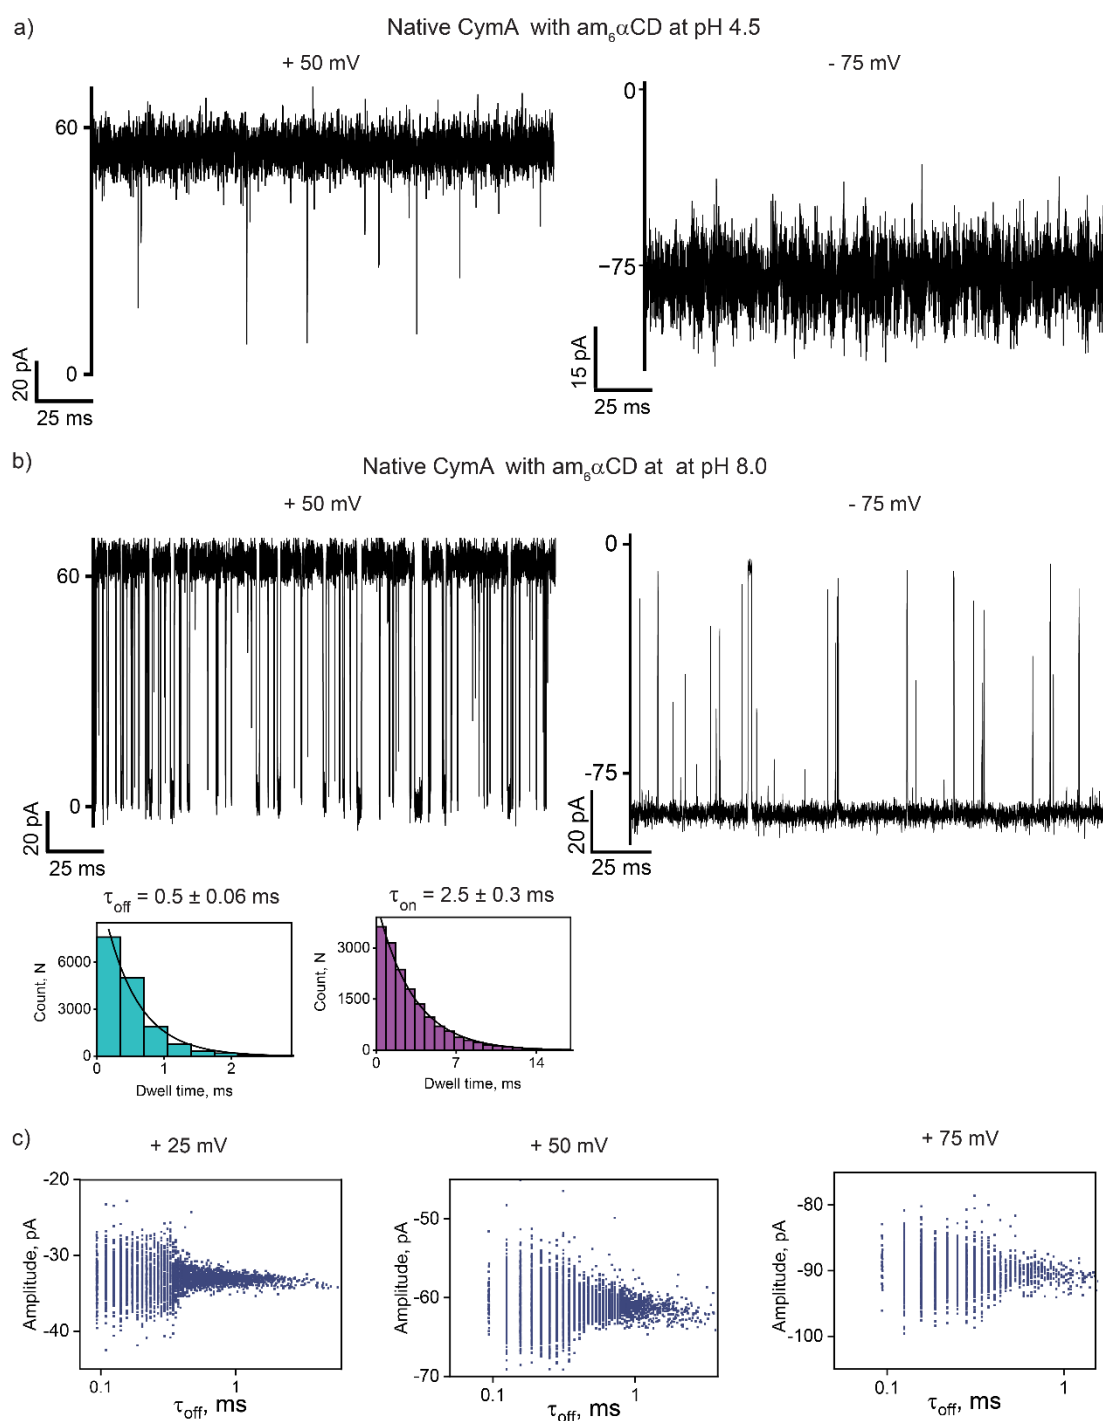

**Fig. S4** Interaction of am<sub>6</sub>αCD with native CymA under different pH conditions.

**a)** Electrical recordings of single native CymA in the presence of am<sub>6</sub>αCD (10 μM, trans) at +50 mV and -75 mV in pH 4.5 **b)** Electrical recordings of single native CymA in the presence of am<sub>6</sub>αCD (10 μM, trans) at +50 mV and -75 mV in pH 8.0. Insets show the corresponding  $\tau_{\text{off}}$  and  $\tau_{\text{on}}$  dwell time histograms of CD blocking fitted with a monoexponential probability function. **c)** Scatter plots of current block amplitudes versus dwell time ( $\tau_{\text{off}}$ ) of CD blocking with native CymA are shown. The current signals were digitally filtered at 7 kHz.



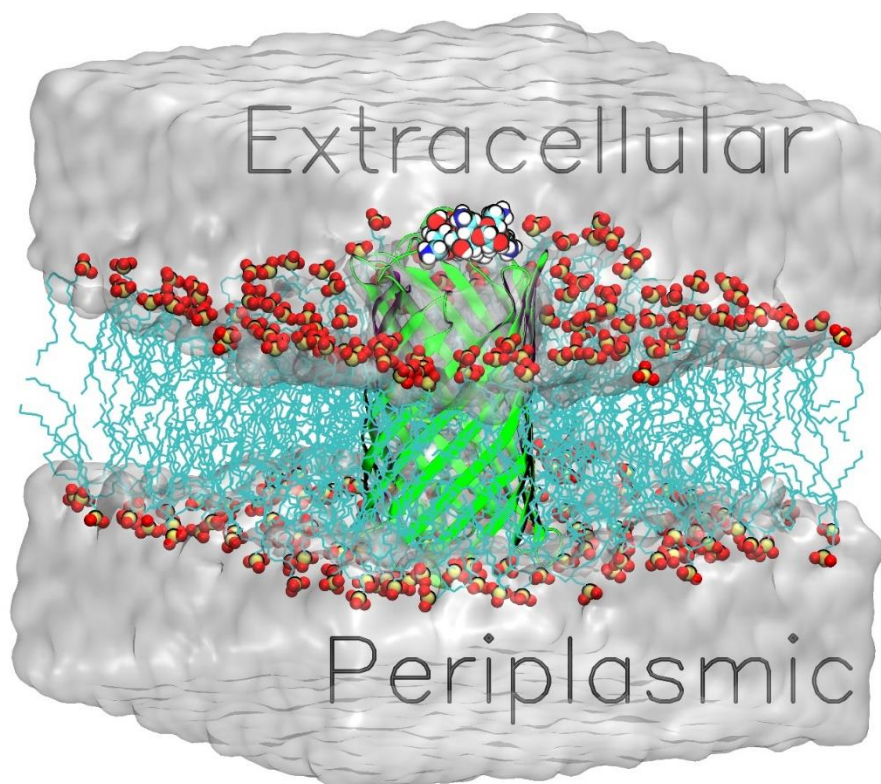

**Fig. S5** Representative configuration of the hydrated CymA embedded in DPhPC lipid bilayer MD-simulation system with am<sub>6</sub>αCD.

The water layer on top and bottom of the lipid bilayer is shown as gray transparent slabs. The hydrophobic chains of the lipids are shown in cyan color. The phosphate groups of the lipids are shown as vdW spheres where the P-atom is shown in yellow and the O-atom in red colored spheres. The native CymA is shown in the green cartoon representation. The am<sub>6</sub>αCD is shown using vdW sphere representation where the C-atoms are shown as cyan spheres, H-atoms as white and O-atoms as red-colored spheres.

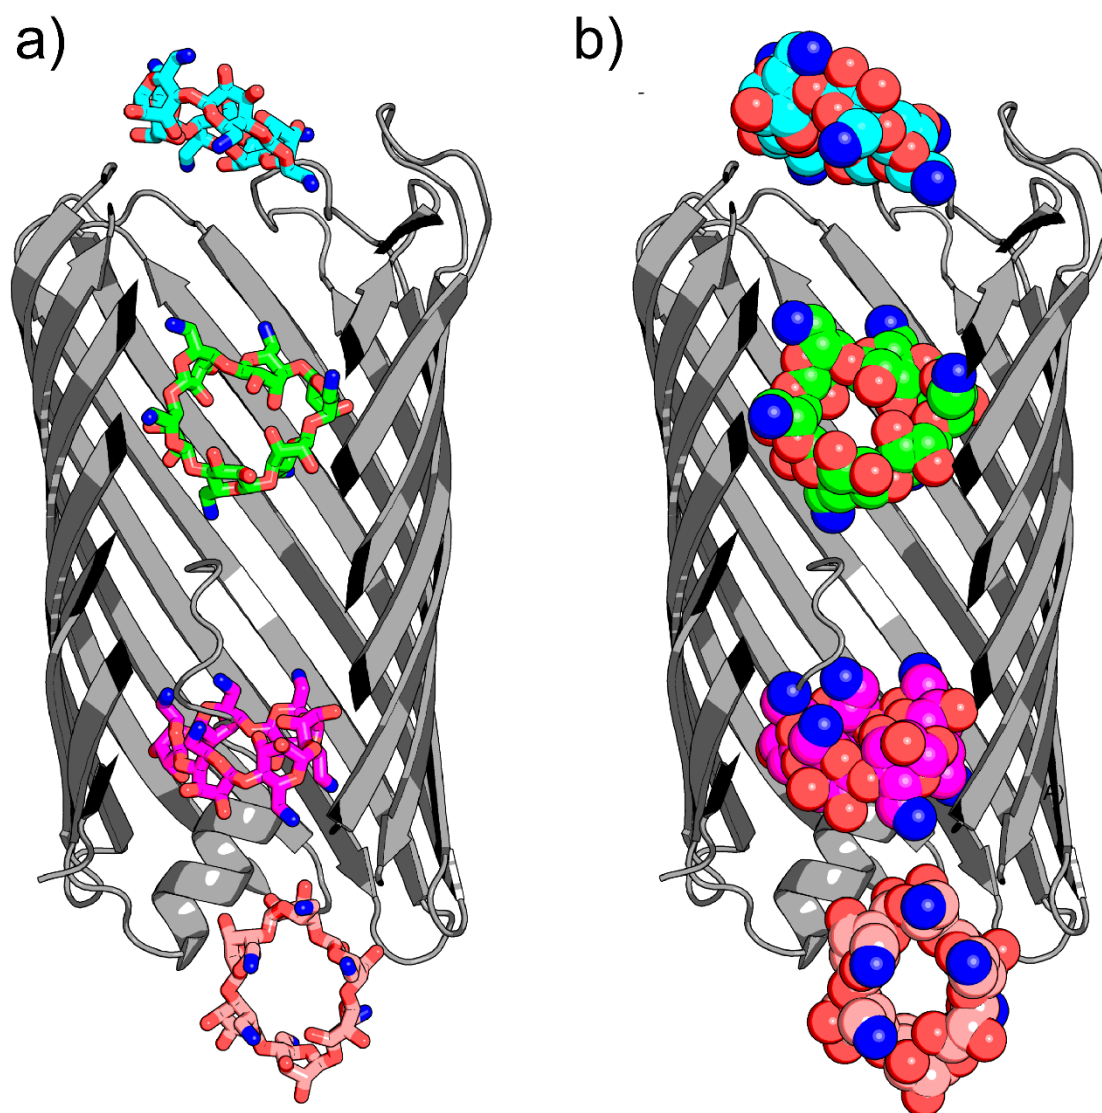

**Fig. S6** Multiple configurations of the am<sub>6</sub>αCD while translocating through the native CymA. The CD assumes different configurations from the extracellular side's entrance to the periplasmic side's exit. The native CymA pore is shown in a cartoon (gray) representation. In **a)** The CD was shown using a stick representation, and the C-atoms were colored differently, rendering different conformations of the CD at various stages of the translocation event. In **b)** CD configurations with space-filling sphere representations for visual comparison.

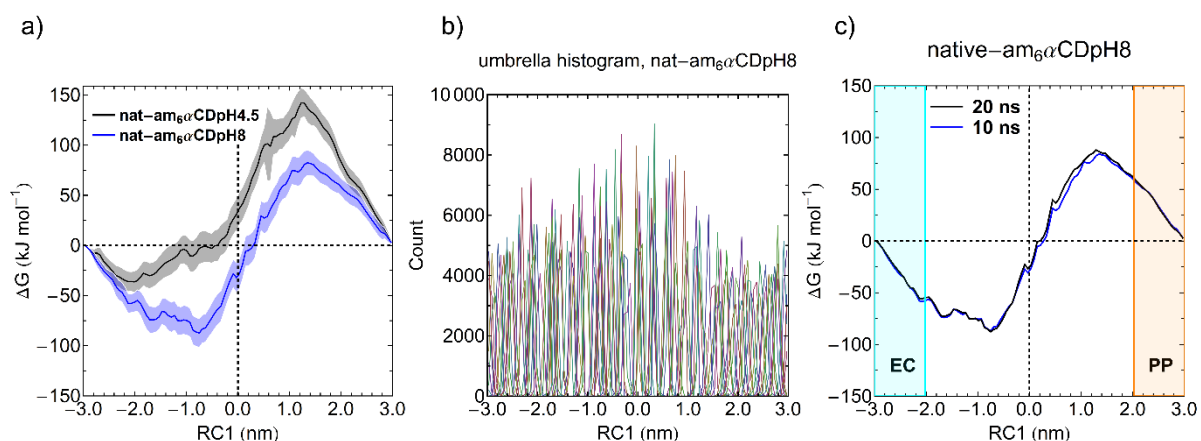

**Fig. S7** A one-dimensional free energy profile was obtained for am<sub>6</sub>αCD translocation through native CymA at pH 4.5 and 8.0.

**a)** The error bars associated with the free energy calculation are calculated using a bootstrapping method implemented in gmx wham utility of GROMACS MD simulation software. The error bars are black (pH 4.5) and blue (pH 8.0) transparent filling on the respective free energy profiles. **b)** The umbrella histogram (121 windows) overlaps for native CymA umbrella sampling simulations at pH 8.0 for RC1 ranging from -3 to +3 nm. **c)** The free energy profiles for am<sub>6</sub>αCD translocation through native CymA at pH 8.0 obtained from 10 ns (blue) and 20 ns (black) simulation times for 121 umbrella windows spanning a range of -3.0 to +3.0 nm for the z-component of protein-ligand center-to-center distances or RC1.

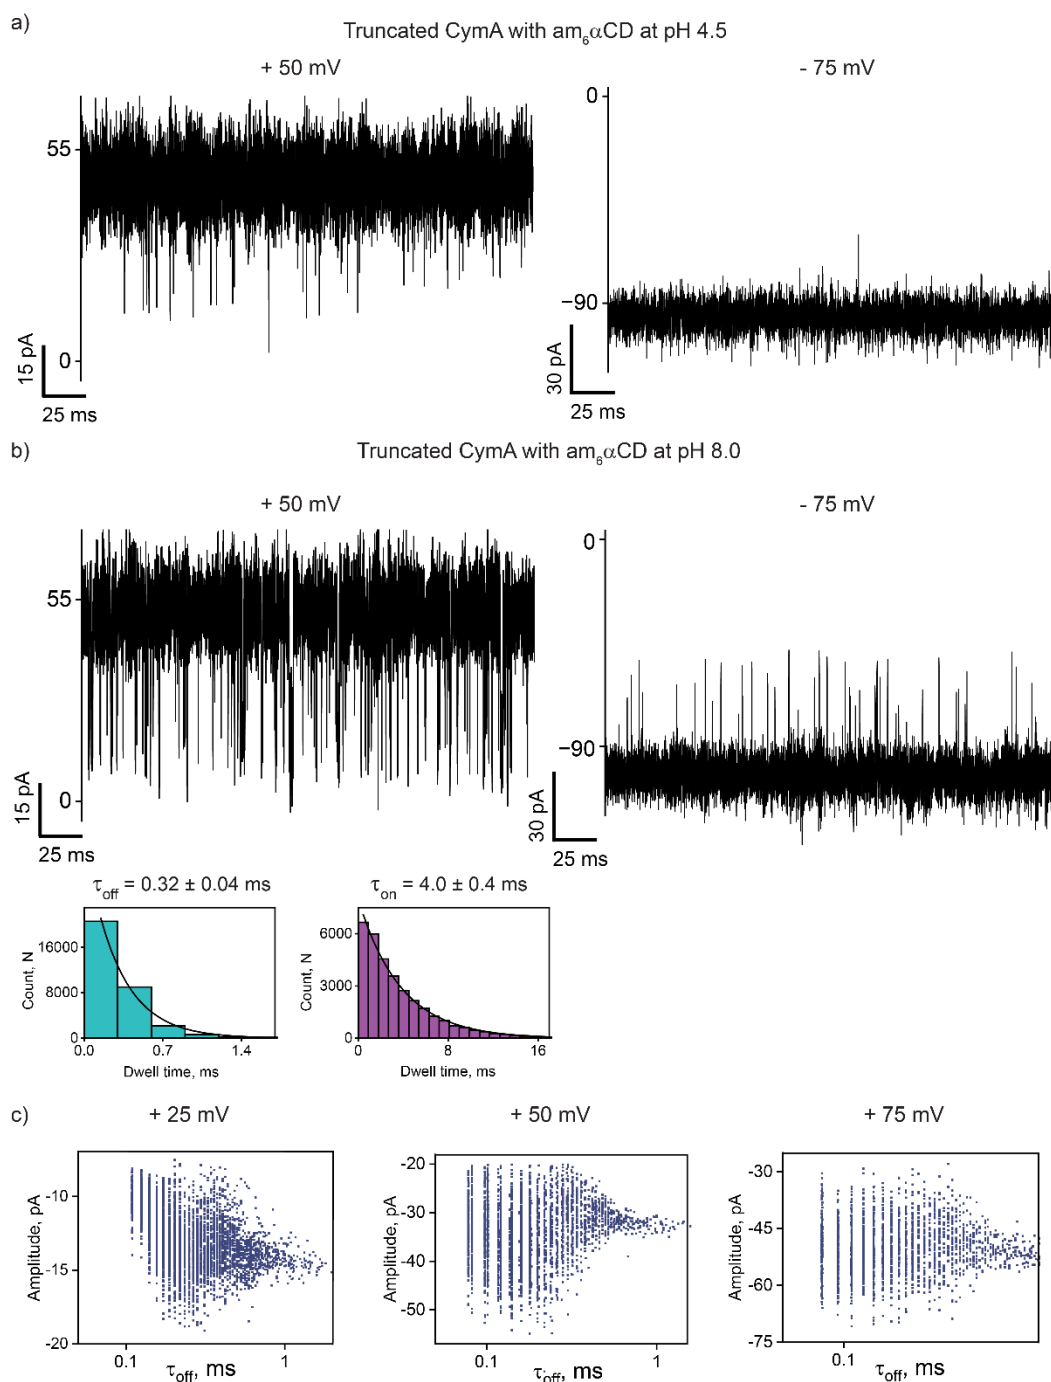

**Fig. S8** Interaction of am<sub>6</sub>αCD with truncated CymA at pH 4.5 and 8.0.

**a)** Electrical recordings of single truncated CymA in the presence of am<sub>6</sub>αCD (10 μM, trans) at +50 mV and -75 mV in pH 4.5 **b)** Electrical recordings of single truncated CymA in the presence of am<sub>6</sub>αCD (10 μM, trans) at +50 mV and -75 mV in pH 8.0. Insets show the corresponding  $\tau_{\text{off}}$  and  $\tau_{\text{on}}$  dwell time histograms of CD blocking fitted with a monoexponential probability function. **c)** Scatter plots of current block amplitudes versus dwell time ( $\tau_{\text{off}}$ ) of CD blocking truncated CymA are shown. The current signals were digitally filtered at 7 kHz.

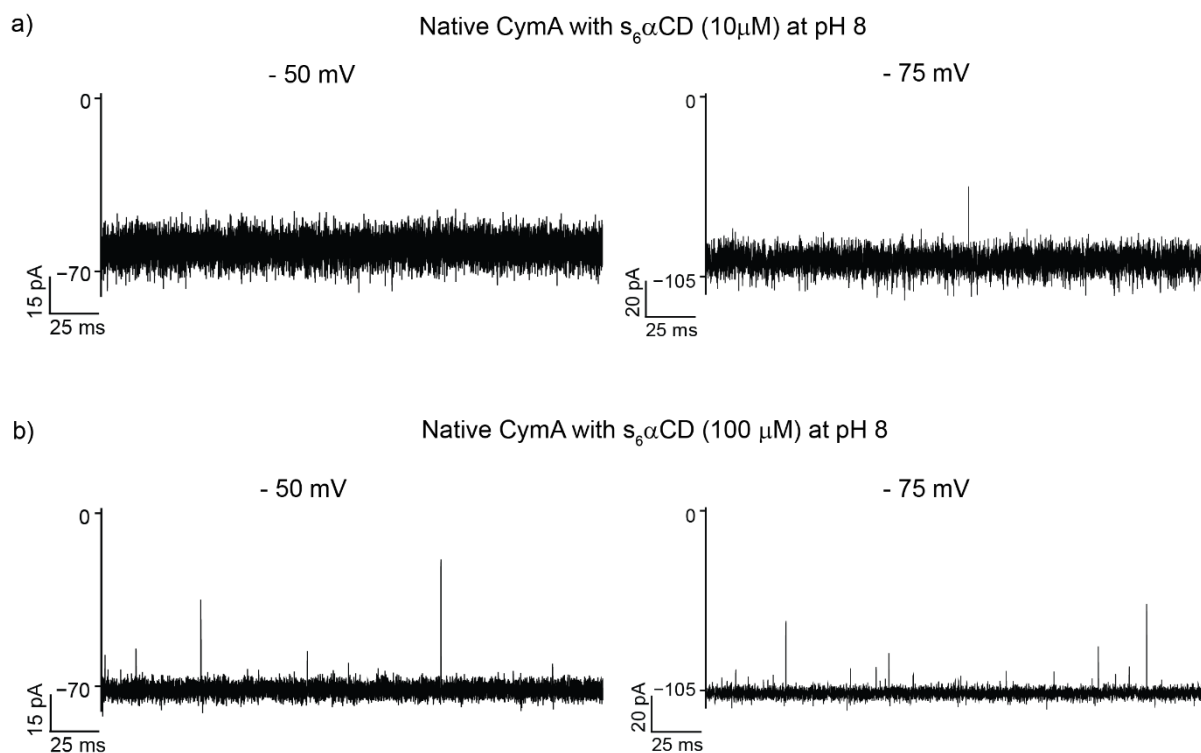

**Fig. S9** Interaction of  $s_6\alpha$ CD with native CymA under different pH conditions.

**a)** Electrical recordings of single native CymA in the presence of  $s_6\alpha$ CD (10  $\mu$ M, trans) at -50 mV and -75 mV in pH 8.0 **b)** Electrical recordings of single native CymA in the presence of  $s_6\alpha$ CD (100  $\mu$ M, trans) at -50 mV and -75 mV at pH 8.0. The current signals were digitally filtered at 7 kHz.

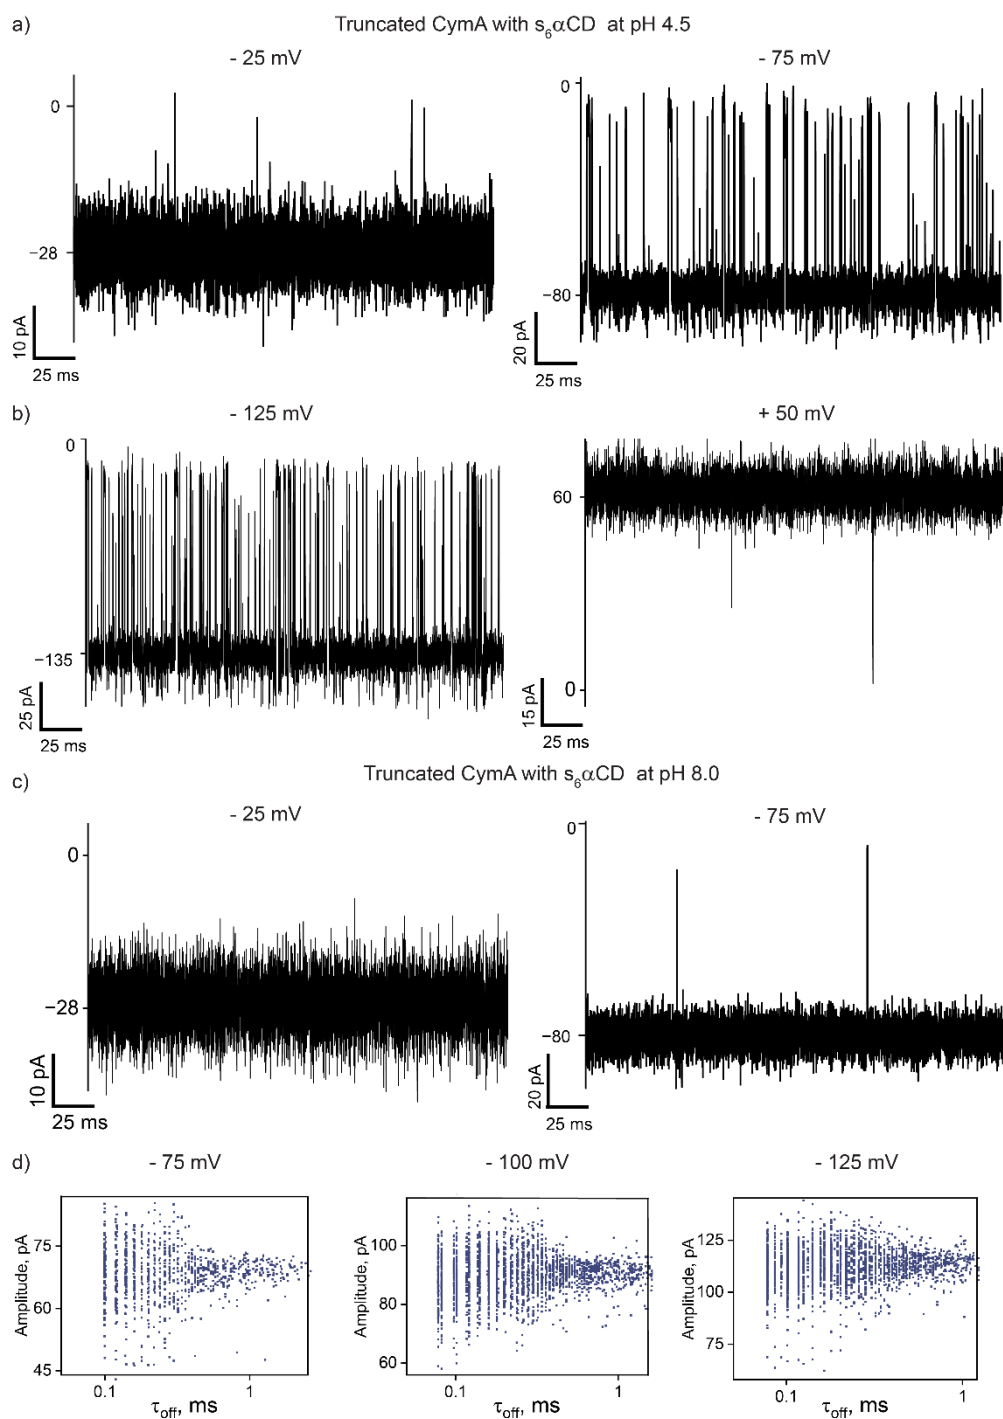

**Fig. S10** Interaction of  $s_6\alpha\text{CD}$  with truncated CymA under different pH conditions.

**a)** Electrical recordings of single truncated CymA in the presence of  $s_6\alpha\text{CD}$  (100  $\mu\text{M}$ , trans) at -25 mV and -75 mV in pH 4.5 **b)** -125 mV and +50 mV in pH 4.5. **c)** Electrical recordings of single truncated CymA in the presence of  $s_6\alpha\text{CD}$  (100  $\mu\text{M}$ , trans) at -25 mV and -75 mV in pH 8.0. **d)** Scatter plots of current block amplitudes versus dwell time ( $\tau_{\text{off}}$ ) of CD blocking truncated CymA are shown. The current signals were digitally filtered at 7 kHz.

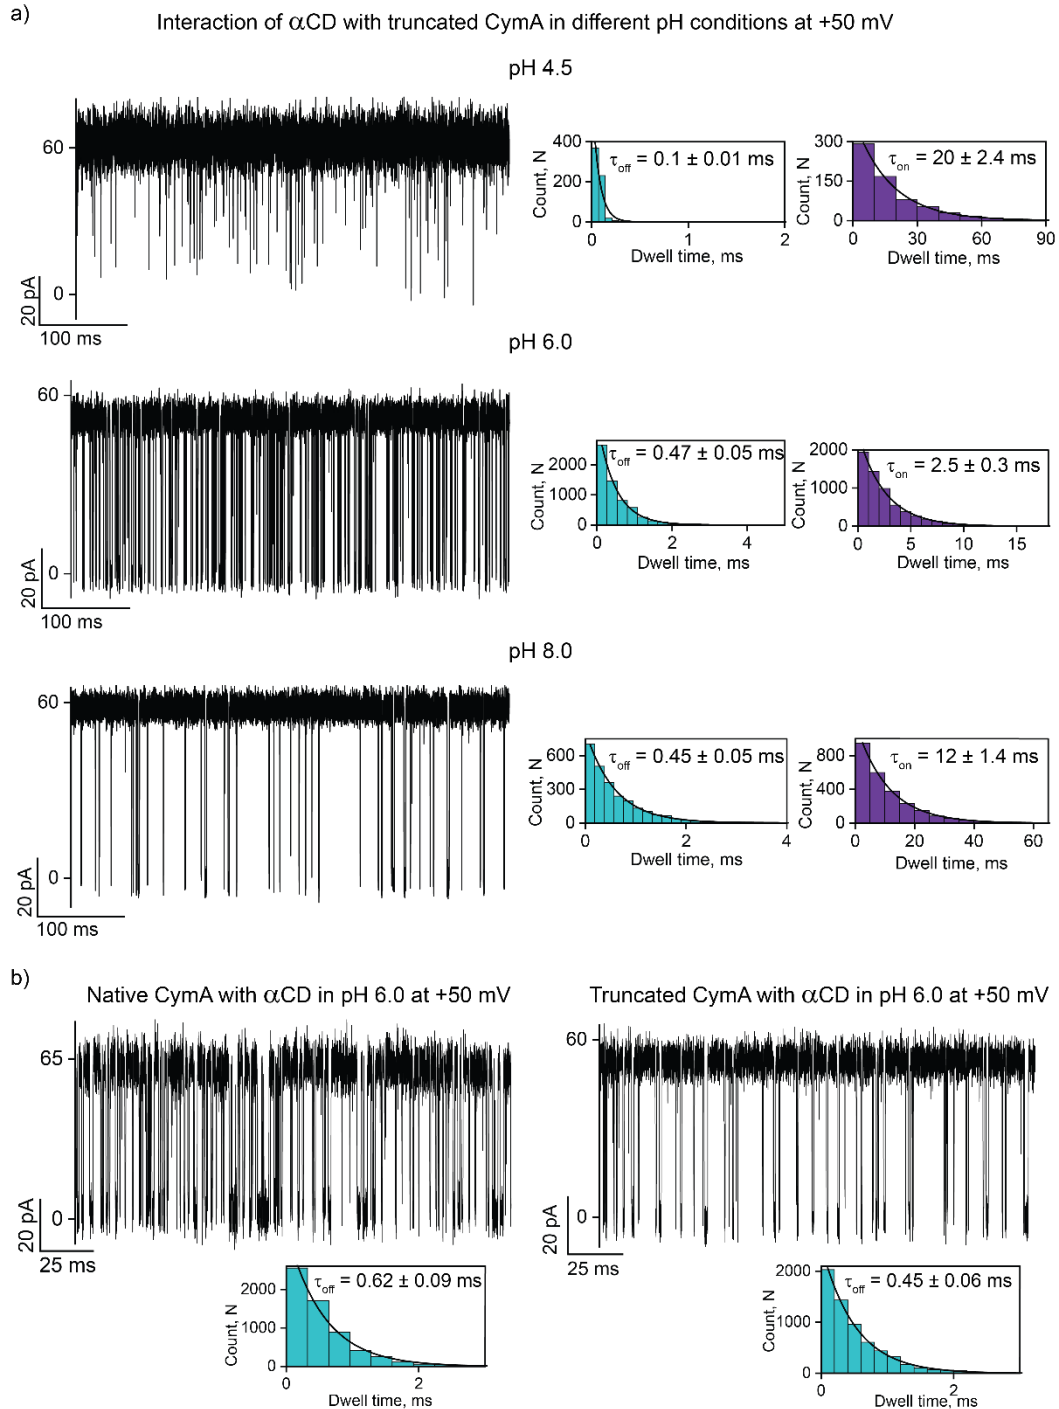

**Fig. S11** Interaction of neutral  $\alpha$ CD with CymA pores at different pHs.

**a)** Electrical recordings of single truncated CymA in the presence of  $\alpha$ CD (100  $\mu$ M, trans) at +50 mV in pH 4.5. Electrical recordings of single truncated CymA in the presence of  $\alpha$ CD (10  $\mu$ M, trans) at +50 mV in pH 6.0 and pH 8.0. Insets show the corresponding  $\tau_{\text{off}}$  and  $\tau_{\text{on}}$  dwell time histograms of CD blocking fitted with a monoexponential probability function. **b)** Electrical recordings of a single native and truncated CymA in the presence of neutral  $\alpha$ CD (10  $\mu$ M, trans) at +50 mV in pH 6.0. The current signals were digitally filtered at 7 kHz.

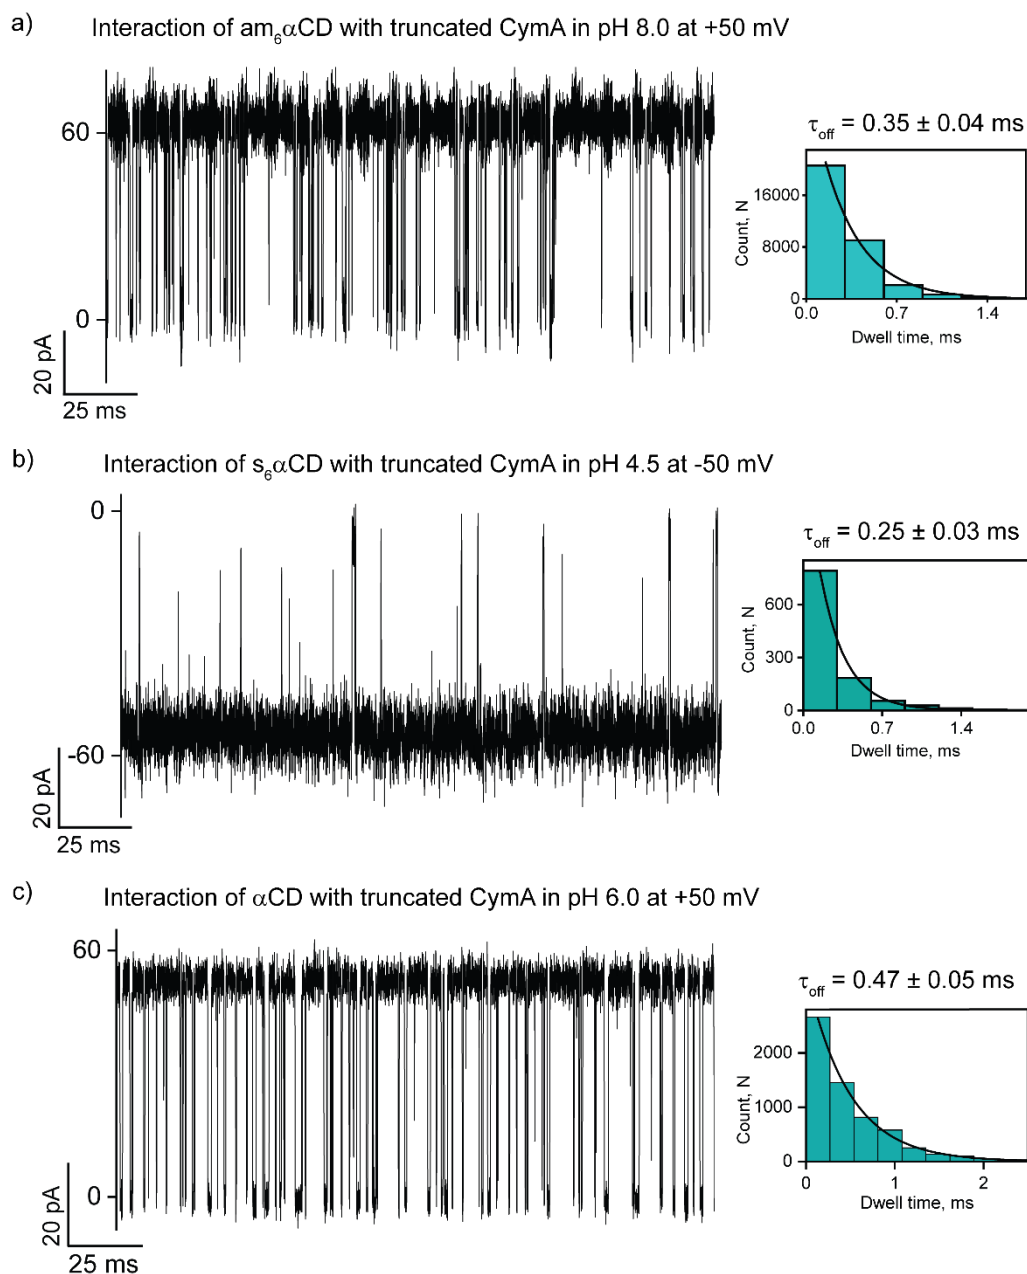

**Fig. S12** Interaction of am<sub>6</sub>αCD, s<sub>6</sub>αCD and αCD with truncated CymA.

**a)** Electrical recordings of single truncated CymA in the presence of am<sub>6</sub>αCD (10 μM, trans) at +50 mV in pH 8.0 **b)** Electrical recordings of single truncated CymA in the presence of s<sub>6</sub>αCD (100 μM, trans) at -50 mV in pH 4.5. **c)** Electrical recordings of single truncated CymA in the presence of neutral αCD (10 μM, trans) at +50 mV in pH 6.0. The current signals were digitally filtered at 7 kHz.



a) Schematic model of planar lipid bilayer system

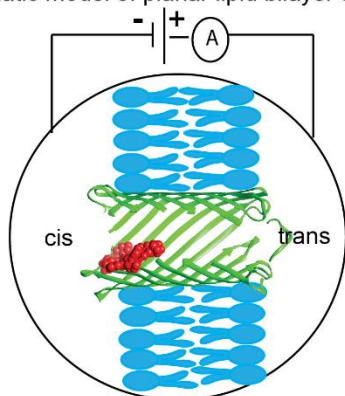

b) Schematic model of horizontal bilayer in orbit 16

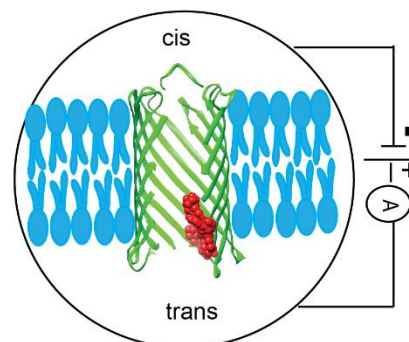

c) Truncated CymA with  $am_6\alpha CD^+$  at pH 8 in orbit16

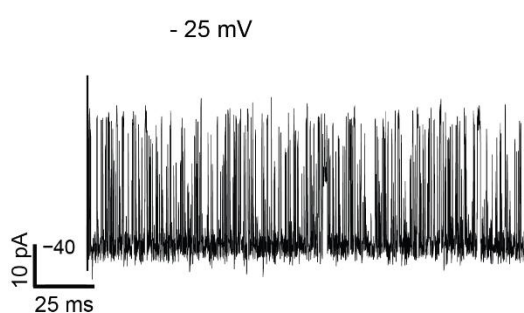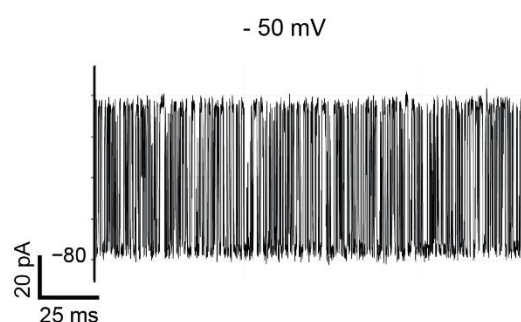

d) Truncated CymA with  $s_6\alpha CD^-$  at pH 8 in orbit16

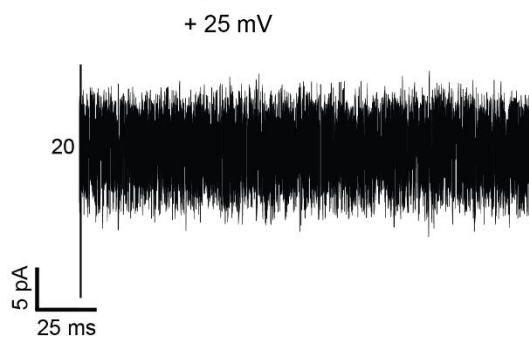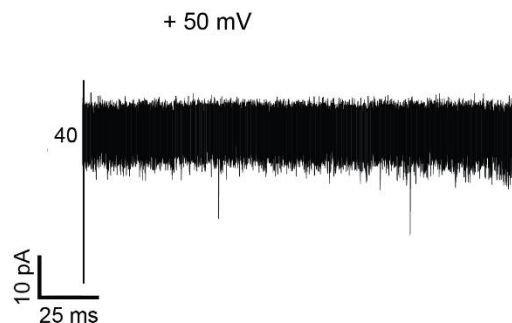

**Fig. S13** Interaction of  $am_6\alpha CD$  and  $s_6\alpha CD$  with truncated CymA at pH 8 in orbit16.

**a)** Schematic of CymA pore orientation in planar lipid bilayer system. **b)** Schematic of CymA pore orientation in Orbit 16 system. **c)** Electrical recordings of single truncated CymA in the presence of  $am_6\alpha CD$  (10  $\mu M$ , cis) at -25 mV and -50 mV in pH 8.0. **d)** Electrical recordings of single truncated CymA in the presence of  $s_6\alpha CD$  (100  $\mu M$ ) at +25 mV and +50 mV in pH 8.0. The current signals were filtered at 10 kHz and sampled at 20 kHz.

a) Crystal structure of native CymA   b) Modelled structure of native CymA   c) Modelled structure of native CymA in the presence of cyclodextrin

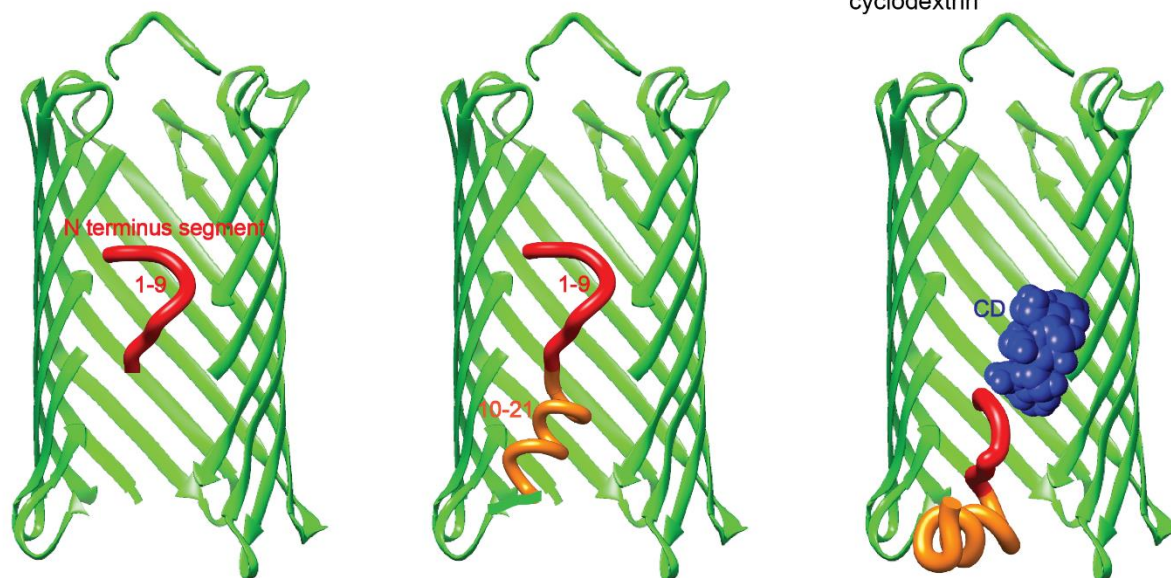

**Fig. S14** Molecular model of substrate translocation through CymA.

**a)** Crystal structure of native CymA highlighting the presence of resolved N terminus segment (residues 1-9). **b)** Modelled native CymA highlighting the entire N terminus segment in the pore. **c)** Translocation of  $\text{am}_6\alpha\text{CD}$  across native CymA and associated N terminus segment conformational dynamics.

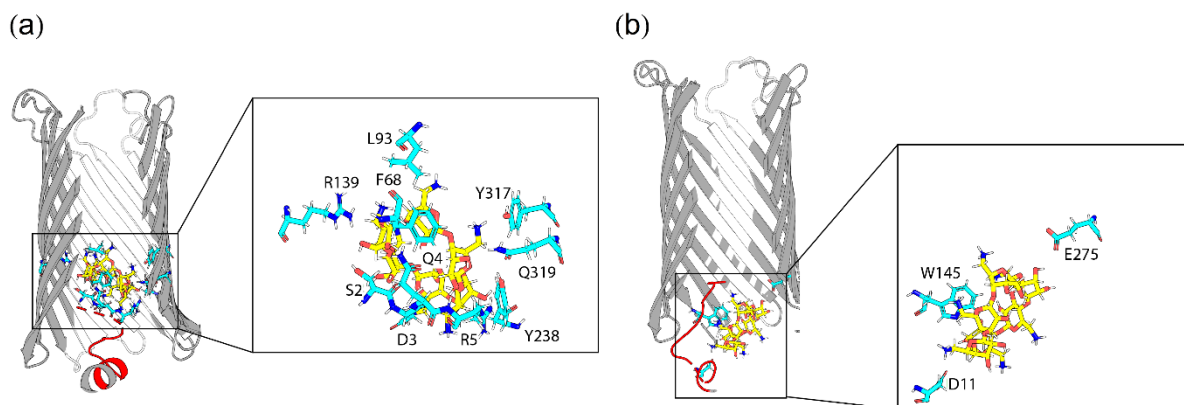

**Fig. S15** CymA protein residues involved in polar interactions with am<sub>6</sub>αCD

**a)** amino acid residues involved in polar interactions with the ligand where the Nterm loop and the ligand coexist inside the pore when the ligand crosses the pore's center. The configuration refers to the Fig. 6C snapshot in the main text. **b)** amino acid residues involved in polar interactions with the ligand where the Nterm loop is inside while the ligand has translocated almost outside the pore towards the periplasmic region. The configuration refers to the Fig. 6D snapshot. The protein is shown in cartoon representation (grey), the N-term loop region (residue index 1-15) is shown in cartoon representation (red) and the amino acid residues involved in polar interactions are shown as sticks (C-cyan, O-red, N-blue, H-white) and the am<sub>6</sub>αCD ligand is shown in sticks representation (C-yellow, O-red, H-white)

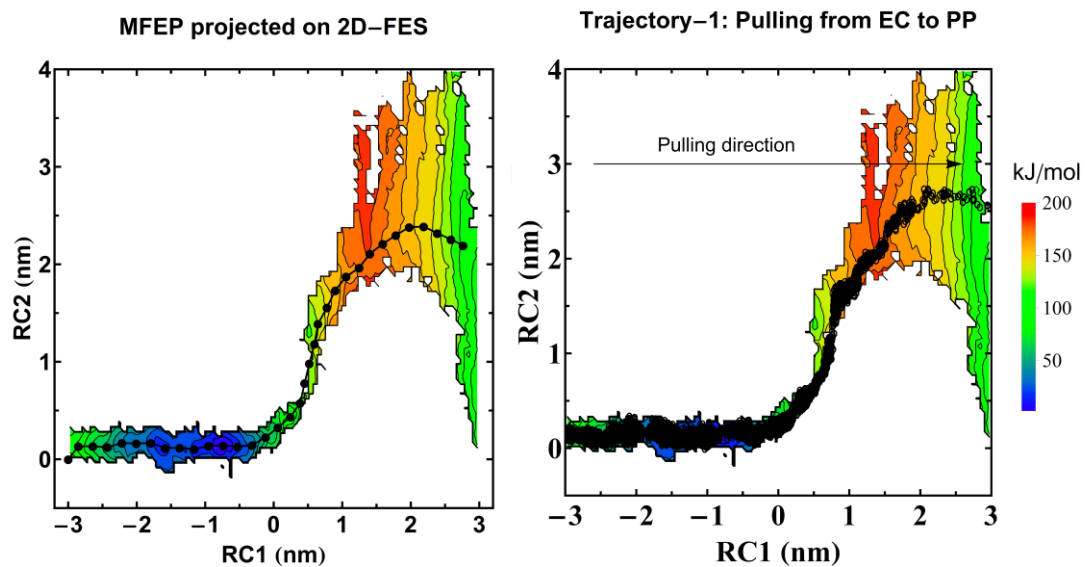

**Fig. S16** A minimum free energy path (MFEP) obtained using a post-string approach. (MFEP) obtained using a post-string approach described by Morita et al<sup>17</sup> and the steered MD trajectory is projected onto the 2D-FES as a function of RC1 and RC2, for am<sub>6</sub>αCD translocation through native CymA at pH 8.

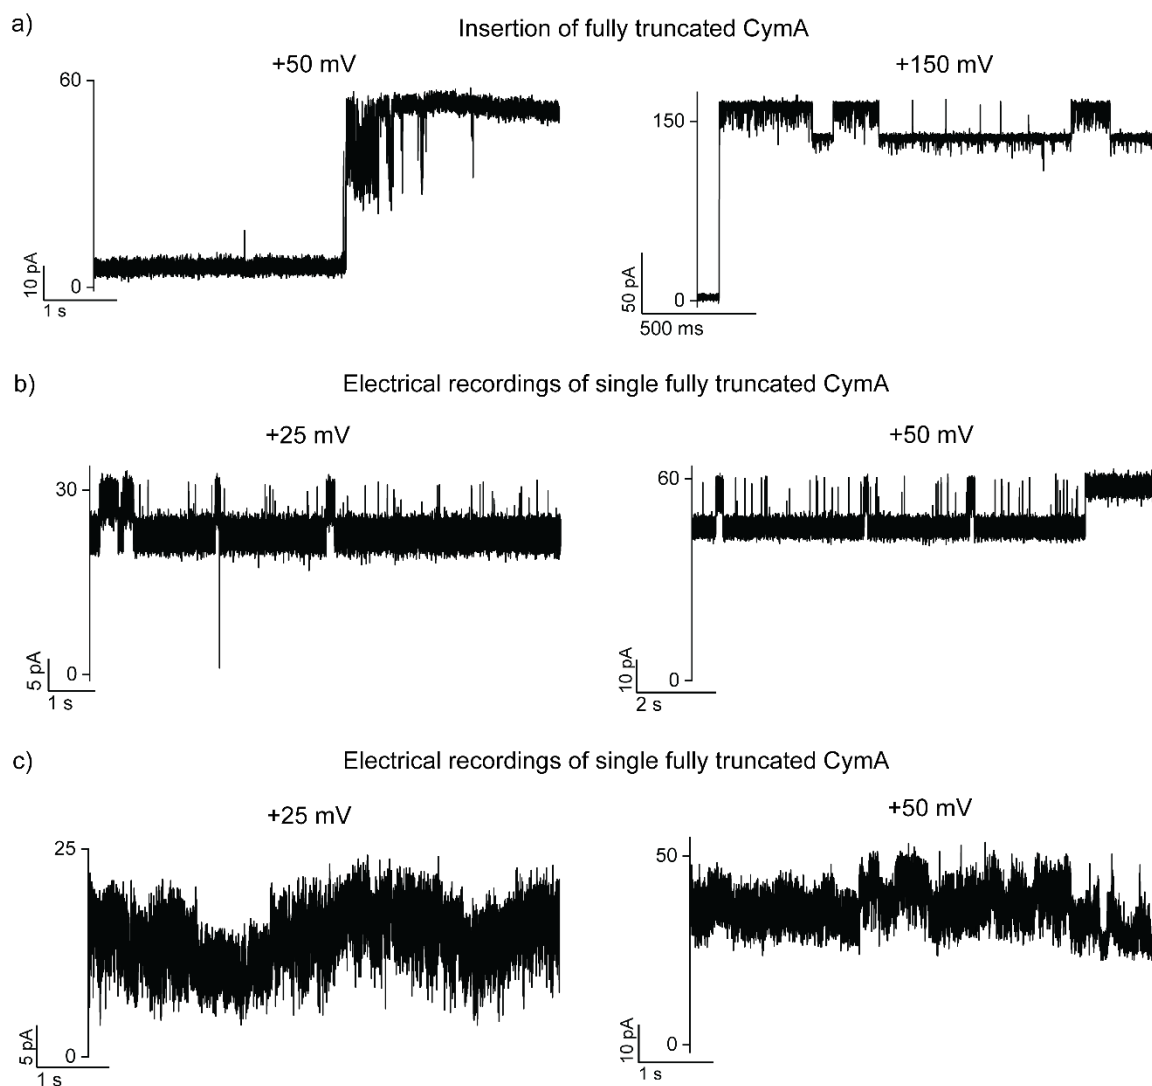

**Fig. S17** Single-channel properties of fully truncated CymA.

**a)** Electrical recordings of fully truncated CymA insertion at +50 mV and +150 mV in pH 8.0.

**b)** Electrical recordings of fully truncated single CymA at +25 mV and +50 mV showing sub conductance states in pH 8.0. **c)** Electrical recordings of fully truncated single CymA showing unstable states at +25 mV and +50 mV in pH 8.0. The current signals were filtered at 2 kHz and sampled at 10 kHz.

Interaction of neomycin with truncated CymA at pH 8.0

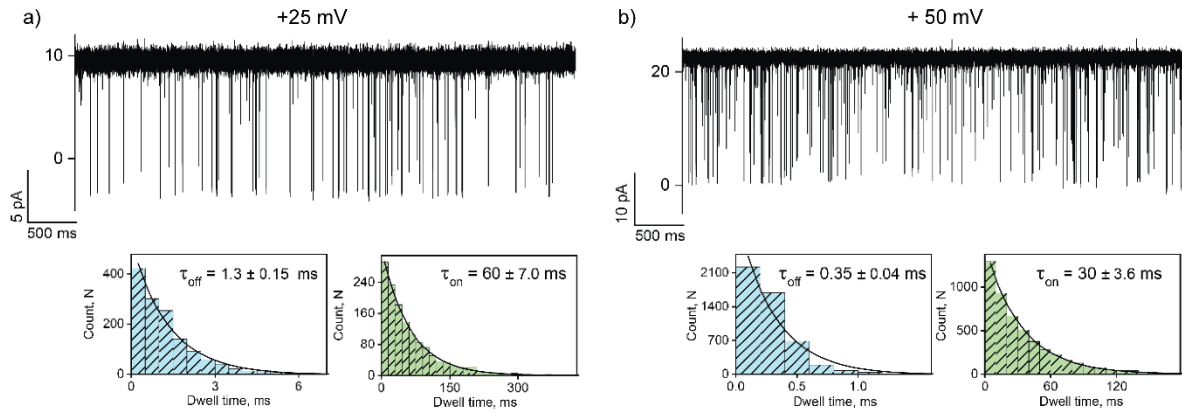

**Fig. S18** Interaction of neomycin with truncated CymA.

**a)** Electrical recordings of single truncated CymA in the presence of neomycin (10  $\mu\text{M}$ , trans) at +25 mV. **b)** +50 mV in pH 8. Insets show the corresponding  $\tau_{\text{off}}$  and  $\tau_{\text{on}}$  dwell time histograms of neomycin blocking fitted with a monoexponential probability function. The current signals were digitally filtered at 7 kHz.

## References:

1. S. Jo, T. Kim, V. G. Iyer and W. Im, *J. Comput. Chem.*, 2008, **29**, 1859-1865.
2. T. J. Dolinsky, P. Czodrowski, H. Li, J. E. Nielsen, J. H. Jensen, G. Klebe and N. A. Baker, *Nucleic Acids Research.*, 2007, **35**, W522-525.
3. M. H. Olsson, C. R. Sondergaard, M. Rostkowski and J. H. Jensen, *J. Chem. Theory Comput.*, 2011, **7**, 525-537.
4. A. D. MacKerell, D. Bashford, M. Bellott, R. L. Dunbrack, J. D. Evanseck, M. J. Field, S. Fischer, J. Gao, H. Guo, S. Ha, D. Joseph-McCarthy, L. Kuchnir, K. Kuczera, F. T. Lau, C. Mattos, S. Michnick, T. Ngo, D. T. Nguyen, B. Prodhom, W. E. Reiher, B. Roux, M. Schlenkrich, J. C. Smith, R. Stote, J. Straub, M. Watanabe, J. Wiorkiewicz-Kuczera, D. Yin and M. Karplus, *J. Phys. Chem. B.*, 1998, **102**, 3586-3616.
5. J. B. Klauda, R. M. Venable, J. A. Freites, J. W. O'Connor, D. J. Tobias, C. Mondragon-Ramirez, I. Vorobyov, A. D. MacKerell, Jr. and R. W. Pastor, *J. Phys. Chem. B.*, 2010, **114**, 7830-7843.
6. K. Vanommeslaeghe, E. Hatcher, C. Acharya, S. Kundu, S. Zhong, J. Shim, E. Darian, O. Guvench, P. Lopes, I. Vorobyov and A. D. Mackerell, Jr., *J. Comput. Chem.*, 2010, **31**, 671-690.
7. R. B. Best, X. Zhu, J. Shim, P. E. Lopes, J. Mittal, M. Feig and A. D. Mackerell, Jr., *J. Chem. Theory Comput.*, 2012, **8**, 3257-3273.
8. S. Páll and B. Hess, *Comput. Phys. Commun.*, 2013, **184**, 2641-2650.
9. T. Darden, D. York and L. Pedersen, *J. Chem. Phys.*, 1993, **98**, 10089-10092.
10. B. Hess, H. Bekker, H. J. C. Berendsen and J. G. E. M. Fraaije, *J. Comput. Chem.*, 1997, **18**, 1463-1472.
11. S. Miyamoto and P. A. Kollman, *J. Comput. Chem.*, 1992, **13**, 952-962.
12. H. J. C. Berendsen, J. P. M. Postma, W. F. van Gunsteren, A. DiNola and J. R. Haak, *J. Chem. Phys.*, 1984, **81**, 3684-3690.
13. S. Nosé, *Mol. Phys.*, 1984, **52**, 255-268.
14. M. Parrinello and A. Rahman, *J. Appl. Phys.*, 1981, **52**, 7182-7190.
15. J. S. Hub, B. L. de Groot and D. van der Spoel, *J. Chem. Theory Comput.*, 2010, **6**, 3713-3720.
16. W. Humphrey, A. Dalke and K. Schulten, *J. Mol. Graph.*, 1996, **14**, 33-38, 27-38.
17. R. Morita, Y. Shigeta and R. Harada, *Chem. Phys. Lett.*, 2021, **782**, 139003.
